# Supplementary material
Source: Elsevier journal article supplement (https://www.sciencedirect.com/science/article/pii/S0121812320300621)
Supplement: mmc1 [file S0121812320300621:mmc1.docx]

**PREGUNTAS PARA EXPERTOS**

**AINES**

1. ¿Se debe disminuir la dosis, continuar a la misma dosis, o suspender temporalmente los antiinflamatorios no esteroides y/o inhibidores Cox 2, en pacientes con enfermedades reumáticas **sin infección** por Covid-19?

a. Disminuir dosis

b. Continuar a la misma dosis

c. Suspender

Comentarios:

2. ¿Se debe disminuir la dosis, continuar a la misma dosis, o suspender temporalmente los antiinflamatorios no esteroides y/o inhibidores Cox 2, en pacientes con enfermedades reumáticas **e infección** por Covid-19?.

a. Disminuir dosis

b. Continuar a la misma dosis

c. Suspender

Comentarios:

**Glucocorticoides**

3. ¿Se debe disminuir la dosis, continuar a la misma dosis, o suspender temporalmente los glucocorticoides, en pacientes con enfermedades reumáticas **sin infección** por Covid-19?.

a. Disminuir dosis

b. Continuar a la misma dosis

c. Suspender

Comentarios:

4. ¿Se debe disminuir la dosis, continuar a la misma dosis, o suspender temporalmente los glucocorticoides, en pacientes con enfermedades reumáticas **e infección** por Covid-19?.

a. Disminuir dosis

b. Continuar a la misma dosis

c. Suspender

Comentarios:

**Antimaláricos**

5. ¿Se debe disminuir la dosis, continuar a la misma dosis, o suspender temporalmente los antimaláricos, en pacientes con enfermedades reumáticas **sin infección** por Covid-19?.

a. Disminuir dosis

b. Continuar a la misma dosis

c. Suspender

Comentarios:

6. ¿Se debe disminuir la dosis, continuar a la misma dosis, o suspender temporalmente los antimaláricos, en pacientes con enfermedades reumáticas **e infección** por Covid-19?.

a. Disminuir dosis

b. Continuar a la misma dosis

c. Suspender

Comentarios:

**Metotrexate**

7. ¿Se debe disminuir la dosis, continuar a la misma dosis, o suspender temporalmente el metotrexato, en pacientes con enfermedades reumáticas **sin infección** por Covid-19?.

a. Disminuir dosis

b. Continuar a la misma dosis

c. Suspender

Comentarios:

8. ¿Se debe disminuir la dosis, continuar a la misma dosis, o suspender temporalmente el metotrexato, en pacientes con enfermedades reumáticas **e infección** por Covid-19?.

a. Disminuir dosis

b. Continuar a la misma dosis

c. Suspender

Comentarios:

**Leflunomida**

9. ¿Se debe disminuir la dosis, continuar a la misma dosis, o suspender temporalmente la leflunomida, en pacientes con enfermedades reumáticas **sin infección** por Covid-19?.

a. Disminuir dosis

b. Continuar a la misma dosis

c. Suspender

Comentarios:

10. ¿Se debe disminuir la dosis, continuar a la misma dosis, o suspender temporalmente la leflunomida, en pacientes con enfermedades reumáticas **e infección** por Covid-19?.

a. Disminuir dosis

b. Continuar a la misma dosis

c. Suspender

Comentarios:

**Ciclofosfamida**

11. ¿Se debe disminuir la dosis, continuar a la misma dosis, o suspender temporalmente la ciclofosfamida, en pacientes con enfermedades reumáticas **sin infección** por Covid-19?.

a. Disminuir dosis

b. Continuar a la misma dosis

c. Suspender

Comentarios:

12. ¿Se debe disminuir la dosis, continuar a la misma dosis, o suspender temporalmente la ciclofosfamida, en pacientes con enfermedades reumáticas **e infección** por Covid-19?.

a. Disminuir dosis

b. Continuar a la misma dosis

c. Suspender

Comentarios:

**Azatioprina**

13. ¿Se debe disminuir la dosis, continuar a la misma dosis, o suspender temporalmente la azatioprina, en pacientes con enfermedades reumáticas **sin infección** por Covid-19?.

a. Disminuir dosis

b. Continuar a la misma dosis

c. Suspender

Comentarios:

14. ¿Se debe disminuir la dosis, continuar a la misma dosis, o suspender temporalmente la azatioprina, en pacientes con enfermedades reumáticas **e infección** por Covid-19?.

a. Disminuir dosis

b. Continuar a la misma dosis

c. Suspender

Comentarios:

**Ciclosporina**

15. ¿Se debe disminuir la dosis, continuar a la misma dosis, o suspender temporalmente la ciclosporina, en pacientes con enfermedades reumáticas **sin infección** por Covid-19?.

a. Disminuir dosis

b. Continuar a la misma dosis

c. Suspender

Comentarios:

16. ¿Se debe disminuir la dosis, continuar a la misma dosis, o suspender temporalmente la ciclosporina, en pacientes con enfermedades reumáticas **e infección** por Covid-19?.

a. Disminuir dosis

b. Continuar a la misma dosis

c. Suspender

Comentarios:

**Sulfasalazina**

17. ¿Se debe disminuir la dosis, continuar a la misma dosis, o suspender temporalmente la sulfasalazina, en pacientes con enfermedades reumáticas **sin infección** por Covid-19?.

a. Disminuir dosis

b. Continuar a la misma dosis

c. Suspender

Comentarios:

18. ¿Se debe disminuir la dosis, continuar a la misma dosis, o suspender temporalmente la sulfasalazina, en pacientes con enfermedades reumáticas **e infección** por Covid-19?.

a. Disminuir dosis

b. Continuar a la misma dosis

c. Suspender

Comentarios:

**Colchicina**

19. ¿Se debe disminuir la dosis, continuar a la misma dosis, o suspender temporalmente la colchicina, en pacientes con enfermedades reumáticas **sin infección** por Covid-19?.

a. Disminuir dosis

b. Continuar a la misma dosis

c. Suspender

Comentarios:

20. ¿Se debe disminuir la dosis, continuar a la misma dosis, o suspender temporalmente la colchicina, en pacientes con enfermedades reumáticas **e infección** por Covid-19?.

a. Disminuir dosis

b. Continuar a la misma dosis

c. Suspender

Comentarios:

**Inmunoglobulina**

21. ¿Se debe disminuir la dosis, continuar a la misma dosis, o suspender temporalmente la inmunoglobulina, en pacientes con enfermedades reumáticas **sin infección** por Covid-19?.

a. Disminuir dosis

b. Continuar a la misma dosis

c. Suspender

Comentarios:

22. ¿Se debe disminuir la dosis, continuar a la misma dosis, o suspender temporalmente la inmunoglobulina, en pacientes con enfermedades reumáticas **e infección** por Covid-19?.

a. Disminuir dosis

b. Continuar a la misma dosis

c. Suspender

Comentarios:

**Anti TNF**

23. ¿Se debe disminuir la dosis, continuar a la misma dosis, o suspender temporalmente el anti TNF, en pacientes con enfermedades reumáticas **sin infección** por Covid-19?.

a. Disminuir dosis

b. Continuar a la misma dosis

c. Suspender

Comentarios:

24. ¿Se debe disminuir la dosis, continuar a la misma dosis, o suspender temporalmente el anti TNF, en pacientes con enfermedades reumáticas **e infección** por Covid-19?.

a. Disminuir dosis

b. Continuar a la misma dosis

c. Suspender

Comentarios:

**Abatacept**

25. ¿Se debe disminuir la dosis, continuar a la misma dosis, o suspender temporalmente el abatacept, en pacientes con enfermedades reumáticas **sin infección** por Covid-19?.

a. Disminuir dosis

b. Continuar a la misma dosis

c. Suspender

Comentarios:

26. ¿Se debe disminuir la dosis, continuar a la misma dosis, o suspender temporalmente el abatacept, en pacientes con enfermedades reumáticas **e infección** por Covid-19?.

a. Disminuir dosis

b. Continuar a la misma dosis

c. Suspender

Comentarios:

**Rituximab**

27. ¿Se debe disminuir la dosis, continuar a la misma dosis, o suspender temporalmente el rituximab, en pacientes con enfermedades reumáticas **sin infección** por Covid-19?.

a. Disminuir dosis

b. Continuar a la misma dosis

c. Suspender

Comentarios:

28. ¿Se debe disminuir la dosis, continuar a la misma dosis, o suspender temporalmente el rituximab, en pacientes con enfermedades reumáticas **e infección** por Covid-19?.

a. Disminuir dosis

b. Continuar a la misma dosis

c. Suspender

Comentarios:

**Tocilizumab**

29 ¿Se debe disminuir la dosis, continuar a la misma dosis, o suspender temporalmente el tocilizumab, en pacientes con enfermedades reumáticas **sin infección** por Covid-19?.

a. Disminuir dosis

b. Continuar a la misma dosis

c. Suspender

Comentarios:

30. ¿Se debe disminuir la dosis, continuar a la misma dosis, o suspender temporalmente el tocilizumab, en pacientes con enfermedades reumáticas **e infección** por Covid-19?.

a. Disminuir dosis

b. Continuar a la misma dosis

c. Suspender

Comentarios:

**Belimumab**

31. ¿Se debe disminuir la dosis, continuar a la misma dosis, o suspender temporalmente el belimumab, en pacientes con enfermedades reumáticas **sin infección** por Covid-19?.

a. Disminuir dosis

b. Continuar a la misma dosis

c. Suspender

Comentarios:

32. ¿Se debe disminuir la dosis, continuar a la misma dosis, o suspender temporalmente el belimumab, en pacientes con enfermedades reumáticas **e infección** por Covid-19?.

a. Disminuir dosis

b. Continuar a la misma dosis

c. Suspender

Comentarios:

**Inhibidores de IL-1**

33. ¿Se debe disminuir la dosis, continuar a la misma dosis, o suspender temporalmente el inhibidor de IL-1, en pacientes con enfermedades reumáticas **sin infección** por Covid-19?.

a. Disminuir dosis

b. Continuar a la misma dosis

c. Suspender

Comentarios:

34. ¿Se debe disminuir la dosis, continuar a la misma dosis, o suspender temporalmente el inhibidor de IL-1, en pacientes con enfermedades reumáticas **e infección** por Covid-19?.

a. Disminuir dosis

b. Continuar a la misma dosis

c. Suspender

Comentarios:

**Ustekinumab**

35. ¿Se debe disminuir la dosis, continuar a la misma dosis, o suspender temporalmente el ustekinumab, en pacientes con enfermedades reumáticas **sin infección** por Covid-19?.

a. Disminuir dosis

b. Continuar a la misma dosis

c. Suspender

Comentarios:

36. ¿Se debe disminuir la dosis, continuar a la misma dosis, o suspender temporalmente el ustekinumab, en pacientes con enfermedades reumáticas **e infección** por Covid-19?.

a. Disminuir dosis

b. Continuar a la misma dosis

c. Suspender

Comentarios:

**Inhibidores de IL-17**

37. ¿Se debe disminuir la dosis, continuar a la misma dosis, o suspender temporalmente el inhibidor de IL-17, en pacientes con enfermedades reumáticas **sin infección** por Covid-19?.

a. Disminuir dosis

b. Continuar a la misma dosis

c. Suspender

Comentarios:

38. ¿Se debe disminuir la dosis, continuar a la misma dosis, o suspender temporalmente el inhibidor de IL-17, en pacientes con enfermedades reumáticas **e infección** por Covid-19?.

a. Disminuir dosis

b. Continuar a la misma dosis

c. Suspender

Comentarios:

**Inhibidores de JAK**

39. ¿Se debe disminuir la dosis, continuar a la misma dosis, o suspender temporalmente el inhibidor de JAK, en pacientes con enfermedades reumáticas **sin infección** por Covid-19?.

a. Disminuir dosis

b. Continuar a la misma dosis

c. Suspender

Comentarios:

40. ¿Se debe disminuir la dosis, continuar a la misma dosis, o suspender temporalmente el inhibidor de JAK, en pacientes con enfermedades reumáticas **e infección** por Covid-19?.

a. Disminuir dosis

b. Continuar a la misma dosis

c. Suspender

Comentarios:

**Micofenolato de Mofetil**

41. ¿Se debe disminuir la dosis, continuar a la misma dosis, o suspender temporalmente la micofenolato de mofetil, en pacientes con enfermedades reumáticas **sin infección** por Covid-19?.

a. Disminuir dosis

b. Continuar a la misma dosis

c. Suspender

Comentarios:

42. ¿Se debe disminuir la dosis, continuar a la misma dosis, o suspender temporalmente la micofenolato de mofetil, en pacientes con enfermedades reumáticas **e infección** por Covid-19?.

a. Disminuir dosis

b. Continuar a la misma dosis

c. Suspender

Comentarios:
